# Supplementary material for: Identification of novel biomarkers and candidate small molecule drugs in rheumatoid arthritis and osteoarthritis based on bioinformatics analysis of high-throughput data
Source: Oxford University Press journal article supplement (doi:10.1042/bsr20193823), 2020-12-01
Supplement: bsr-2019-3823_supp.pdf [file bsr-2019-3823_supp.pdf]

synovial tissue

peripheral blood

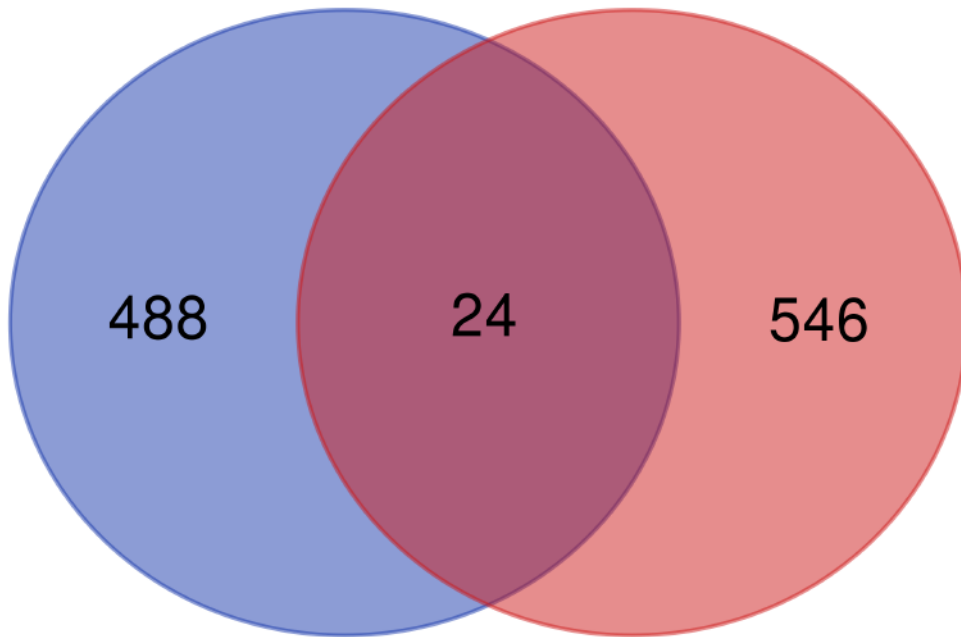

synovial tissue

bone marrow

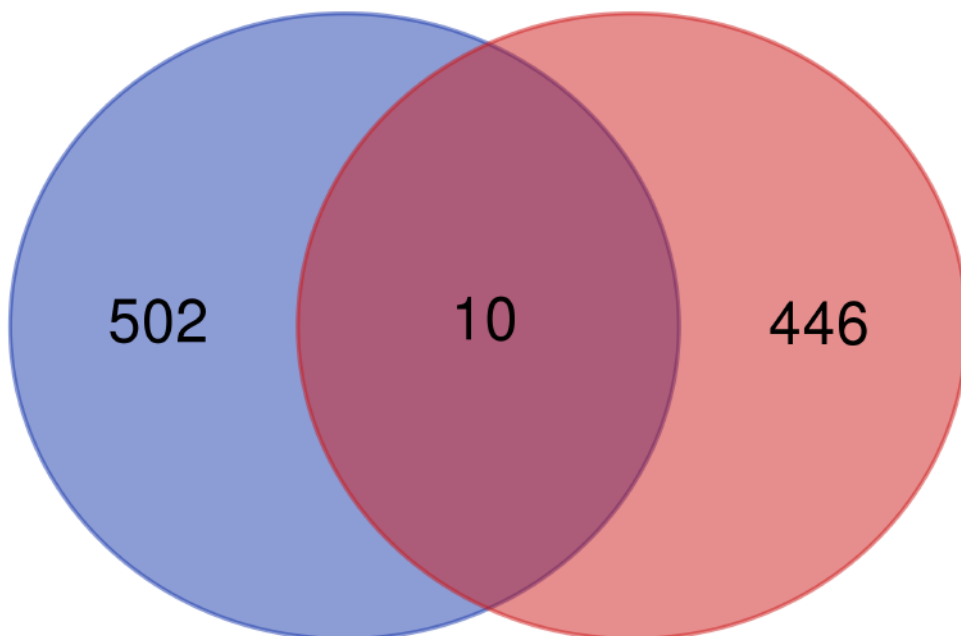

**RA vs OA**

GSE12021

GSE100786

**Supplementary Table 1 The top 10 DEGs in RA and NC were verified in GSE55235.**

| Gene symbol | Fold-change  | P-value     |
|-------------|--------------|-------------|
| HLA-DRB4    | 2.745061813  | 0.020334961 |
| CXCL13      | 6.184201362  | 1.33441E-09 |
| PLA2G2D     | 2.648396684  | 0.000363523 |
| CXCL9       | 2.564950266  | 5.27067E-06 |
| GABBR1      | 3.965429039  | 1.26869E-07 |
| ADAMDEC1    | 3.294369641  | 1.11079E-09 |
| IL21R       | 1.837310467  | 1.96539E-06 |
| PTPRCAP     | 2.100081267  | 7.72729E-06 |
| CXCL10      | 1.976383233  | 6.13273E-06 |
| SLAMF8      | 2.219171944  | 1.60026E-09 |
| SGCA        | -1.627227378 | 0.000103414 |
| WIF1        | -2.626945213 | 0.000327803 |
| SCRG1       | -2.41571327  | 5.82003E-06 |
| RERGL       | -2.020052254 | 6.4712E-05  |
| STMN2       | -1.692069842 | 0.000842938 |
| ZIC1        | -3.779380032 | 0.00017211  |
| TOX3        | -2.908460707 | 0.002935494 |
| NELL1       | -1.762191949 | 0.001163006 |
| C7          | -2.853407158 | 8.59428E-06 |
| SGCG        | -0.305196375 | 0.595344054 |

**supplementary Table 2 Functional and pathway enrichment analysis of the DEGs in RA vs NC group.**

| Category         | Term                                                | Count | PValue     |
|------------------|-----------------------------------------------------|-------|------------|
| GOTERM_BP_DIRECT | GO:0006955~immune response                          | 44    | 1.80E-21   |
| GOTERM_BP_DIRECT | GO:0050853~B cell receptor signaling pathway        | 18    | 1.46E-17   |
| GOTERM_BP_DIRECT | GO:0006958~complement activation, classical pathway | 19    | 6.59E-14   |
| GOTERM_BP_DIRECT | GO:0050871~positive regulation of B cell activation | 12    | 1.85E-13   |
| GOTERM_BP_DIRECT | GO:0006910~phagocytosis, recognition                | 12    | 4.98E-13   |
| GOTERM_CC_DIRECT | GO:0009897~external side of plasma membrane         | 25    | 5.00E-13   |
| GOTERM_CC_DIRECT | GO:0042571~immunoglobulin complex, circulating      | 9     | 5.29E-10   |
| GOTERM_CC_DIRECT | GO:0072562~blood microparticle                      | 18    | 1.51E-09   |
| GOTERM_CC_DIRECT | GO:0005576~extracellular region                     | 55    | 2.71E-06   |
| GOTERM_CC_DIRECT | GO:0005886~plasma membrane                          | 95    | 0.00274657 |
| GOTERM_MF_DIRECT | GO:0003823~antigen binding                          | 21    | 6.11E-16   |
| GOTERM_MF_DIRECT | GO:0034987~immunoglobulin receptor binding          | 12    | 1.81E-13   |
| GOTERM_MF_DIRECT | GO:0008009~chemokine activity                       | 9     | 1.60E-06   |
| GOTERM_MF_DIRECT | GO:0004252~serine-type endopeptidase activity       | 18    | 1.90E-06   |
| GOTERM_MF_DIRECT | GO:0048248~CXCR3 chemokine receptor binding         | 4     | 4.79E-05   |
| KEGG_PATHWAY     | hsa04060:Cytokine-cytokine receptor interaction     | 18    | 1.24E-06   |
| KEGG_PATHWAY     | hsa05340:Primary immunodeficiency                   | 7     | 2.58E-05   |
| KEGG_PATHWAY     | hsa05321:Inflammatory bowel disease (IBD)           | 8     | 1.31E-04   |
| KEGG_PATHWAY     | hsa04662:B cell receptor signaling pathway          | 8     | 2.12E-04   |
| KEGG_PATHWAY     | hsa05166:HTLV-I infection                           | 14    | 5.71E-04   |

**supplementary Table 3 Functional and pathway enrichment analysis of the DEGs in OA vs NC group.**

| Category         | Term                                                             | Count | PValue     |
|------------------|------------------------------------------------------------------|-------|------------|
| GOTERM_BP_DIRECT | GO:0045444~fat cell differentiation                              | 8     | 3.70E-04   |
| GOTERM_BP_DIRECT | GO:0001701~in utero embryonic development                        | 12    | 6.71E-04   |
| GOTERM_BP_DIRECT | GO:0001525~angiogenesis                                          | 13    | 8.53E-04   |
| GOTERM_BP_DIRECT | GO:0030728~ovulation                                             | 4     | 0.00117787 |
| GOTERM_BP_DIRECT | GO:0002053~positive regulation of mesenchymal cell proliferation | 5     | 0.00119207 |
| GOTERM_CC_DIRECT | GO:0097381~photoreceptor disc membrane                           | 4     | 0.00475457 |
| GOTERM_CC_DIRECT | GO:0000439~core TFIID complex                                    | 3     | 0.01107251 |
| GOTERM_CC_DIRECT | GO:0042995~cell projection                                       | 6     | 0.01217713 |
| GOTERM_CC_DIRECT | GO:0005813~centrosome                                            | 16    | 0.01248841 |
| GOTERM_CC_DIRECT | GO:0005923~bicellular tight junction                             | 7     | 0.01784125 |
| GOTERM_MF_DIRECT | GO:0044822~poly(A) RNA binding                                   | 34    | 0.00738839 |
| GOTERM_MF_DIRECT | GO:0019901~protein kinase binding                                | 15    | 0.01165975 |
| GOTERM_MF_DIRECT | GO:0005515~protein binding                                       | 183   | 0.02608831 |
| GOTERM_MF_DIRECT | GO:0005509~calcium ion binding                                   | 22    | 0.02908331 |
| GOTERM_MF_DIRECT | GO:0005251~delayed rectifier potassium channel activity          | 4     | 0.02942848 |
| KEGG_PATHWAY     | hsa04668:TNF signaling pathway                                   | 9     | 7.64E-04   |
| KEGG_PATHWAY     | hsa04744:Phototransduction                                       | 5     | 0.00139913 |
| KEGG_PATHWAY     | hsa05164:Influenza A                                             | 10    | 0.00473497 |
| KEGG_PATHWAY     | hsa03420:Nucleotide excision repair                              | 5     | 0.01071053 |
| KEGG_PATHWAY     | hsa05200:Pathways in cancer                                      | 15    | 0.01321574 |

**supplementary Table 4 Functional and pathway enrichment analysis of the DEGs in RA vs OA group.**

| Category         | Term                                                     | Count | PValue     |
|------------------|----------------------------------------------------------|-------|------------|
| GOTERM_BP_DIRECT | GO:0006955~immune response                               | 23    | 1.50E-09   |
| GOTERM_BP_DIRECT | GO:0006954~inflammatory response                         | 19    | 2.12E-07   |
| GOTERM_BP_DIRECT | GO:0070098~chemokine-mediated signaling pathway          | 8     | 1.29E-05   |
| GOTERM_BP_DIRECT | GO:0030816~positive regulation of cAMP metabolic process | 4     | 2.57E-05   |
| GOTERM_BP_DIRECT | GO:0016525~negative regulation of angiogenesis           | 7     | 6.07E-05   |
| GOTERM_CC_DIRECT | GO:0005576~extracellular region                          | 49    | 5.28E-12   |
| GOTERM_CC_DIRECT | GO:0009897~external side of plasma membrane              | 17    | 5.58E-10   |
| GOTERM_CC_DIRECT | GO:0005615~extracellular space                           | 39    | 6.60E-09   |
| GOTERM_CC_DIRECT | GO:0005886~plasma membrane                               | 67    | 3.46E-05   |
| GOTERM_CC_DIRECT | GO:0005887~integral component of plasma membrane         | 32    | 3.73E-05   |
| GOTERM_MF_DIRECT | GO:0008201~heparin binding                               | 13    | 1.29E-07   |
| GOTERM_MF_DIRECT | GO:0048248~CXCR3 chemokine receptor binding              | 4     | 1.14E-05   |
| GOTERM_MF_DIRECT | GO:0008009~chemokine activity                            | 6     | 1.61E-04   |
| GOTERM_MF_DIRECT | GO:0004896~cytokine receptor activity                    | 5     | 5.41E-04   |
| GOTERM_MF_DIRECT | GO:0004872~receptor activity                             | 9     | 0.00216207 |
| KEGG_PATHWAY     | hsa04060:Cytokine-cytokine receptor interaction          | 15    | 2.33E-06   |
| KEGG_PATHWAY     | hsa05340:Primary immunodeficiency                        | 5     | 9.03E-04   |
| KEGG_PATHWAY     | hsa04062:Chemokine signaling pathway                     | 9     | 0.00267603 |
| KEGG_PATHWAY     | hsa04514:Cell adhesion molecules (CAMs)                  | 7     | 0.00994524 |
| KEGG_PATHWAY     | hsa04630:Jak-STAT signaling pathway                      | 7     | 0.01095865 |
